# Supplementary material for: Preparation of porous and hollow Fe3O4@C spheres as an efficient anode material for a high-performance Li-ion battery
Source: Royal Society of Chemistry journal article supplement (doi:10.1039/c3ra45300f), 2013-11-19
Supplement: c3ra45300f.pdf [file c3ra45300f.pdf]

## Supporting Information

### ***Preparation of Porous and Hollow Fe<sub>3</sub>O<sub>4</sub> @C Spheres as Efficient Anode Materials for High-Performance Li-Ion Battery***

Hongbo Geng,<sup>a,b</sup> Qun Zhou,<sup>b</sup> Junwei Zheng,<sup>a\*</sup> Hongwei Gu<sup>b\*</sup>

<sup>a</sup>Institute of Chemical Power Sources, Soochow University, Suzhou, China, 215123; <sup>b</sup>Key Laboratory of Organic Synthesis of Jiangsu Province, College of Chemical, Chemical Engineering and Materials Science, Soochow University, Suzhou, China, 215123

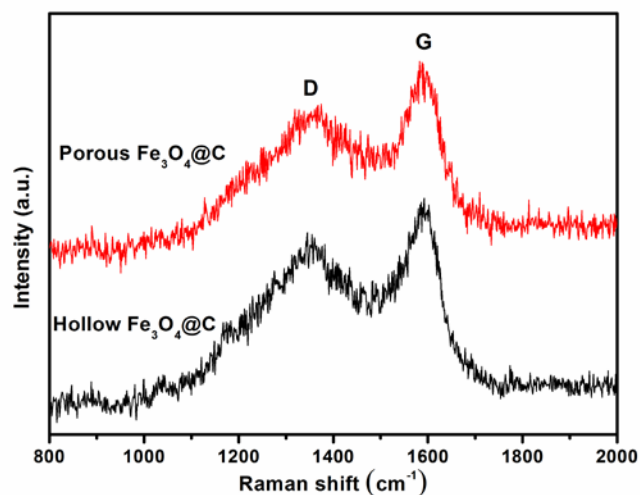

**Fig. S1** Raman spectra of *p*-Fe<sub>3</sub>O<sub>4</sub>@C and *h*-Fe<sub>3</sub>O<sub>4</sub>@C.

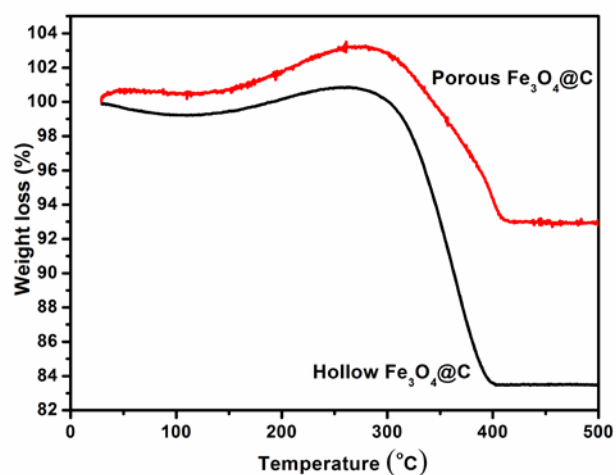

**Fig. S2** TGA spectra of *p*-Fe<sub>3</sub>O<sub>4</sub>@C and *h*-Fe<sub>3</sub>O<sub>4</sub>@C.

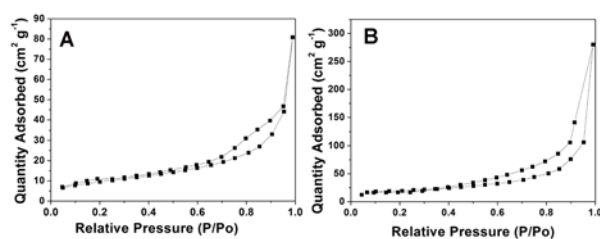

**Fig. S3** Nitrogen adsorption–desorption isotherms of (A) *p*-Fe<sub>3</sub>O<sub>4</sub> and (B) *h*-Fe<sub>3</sub>O<sub>4</sub>.

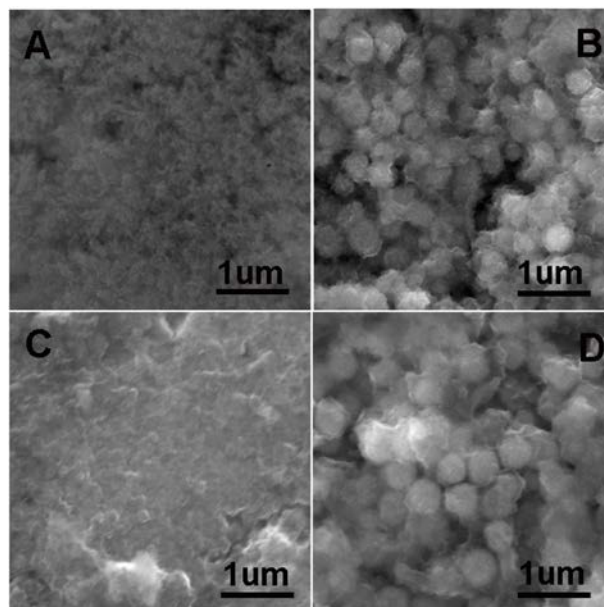

**Fig. S4** SEM images of *h*-Fe<sub>3</sub>O<sub>4</sub> (A), *p*-Fe<sub>3</sub>O<sub>4</sub> (B), *h*-Fe<sub>3</sub>O<sub>4</sub>@C (C) and *p*-Fe<sub>3</sub>O<sub>4</sub>@C (D) after 3 cycles.
